# Supplementary material for: Iridium tetrazolato complexes as efficient protein staining agents
Source: Royal Society of Chemistry journal article supplement (doi:10.1039/d2dt02564g), 2022-01-01
Supplement: d2dt02564g1.pdf [file d2dt02564g1.pdf]

## Electronic Supplementary Information

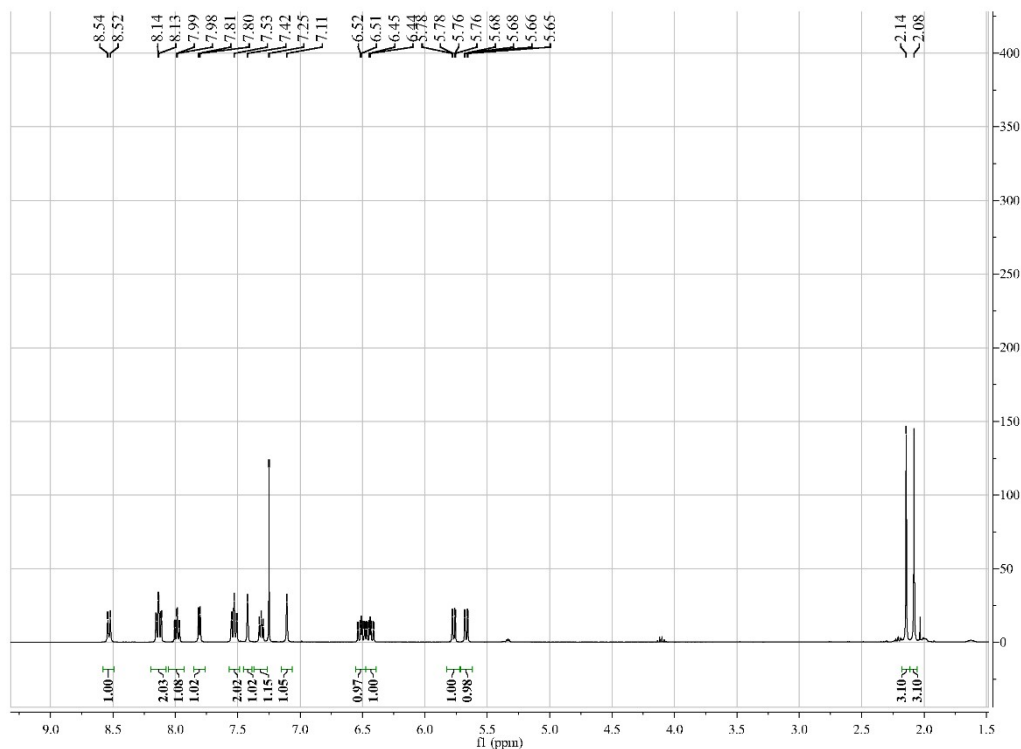

Fig. S1. <sup>1</sup>H NMR spectra of Ir-CH<sub>3</sub>TAZ in CDCl<sub>3</sub>.

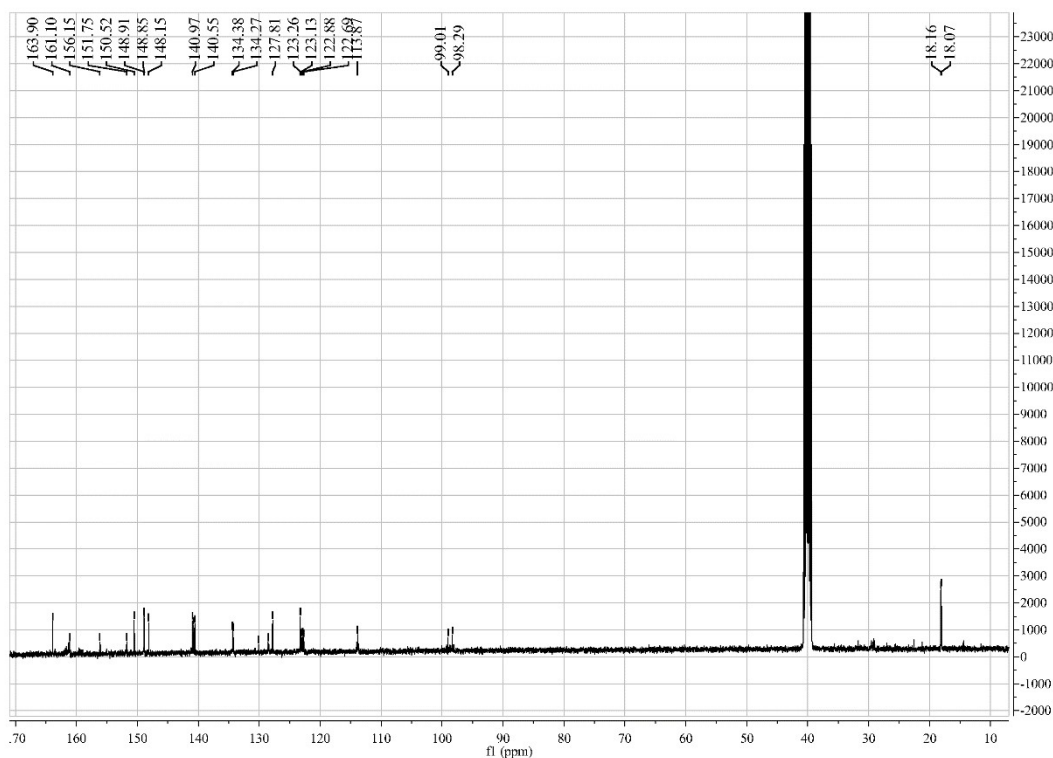

Fig. S2. <sup>13</sup>C NMR spectra of Ir-CH<sub>3</sub>TAZ in DMSO-d<sub>6</sub>.

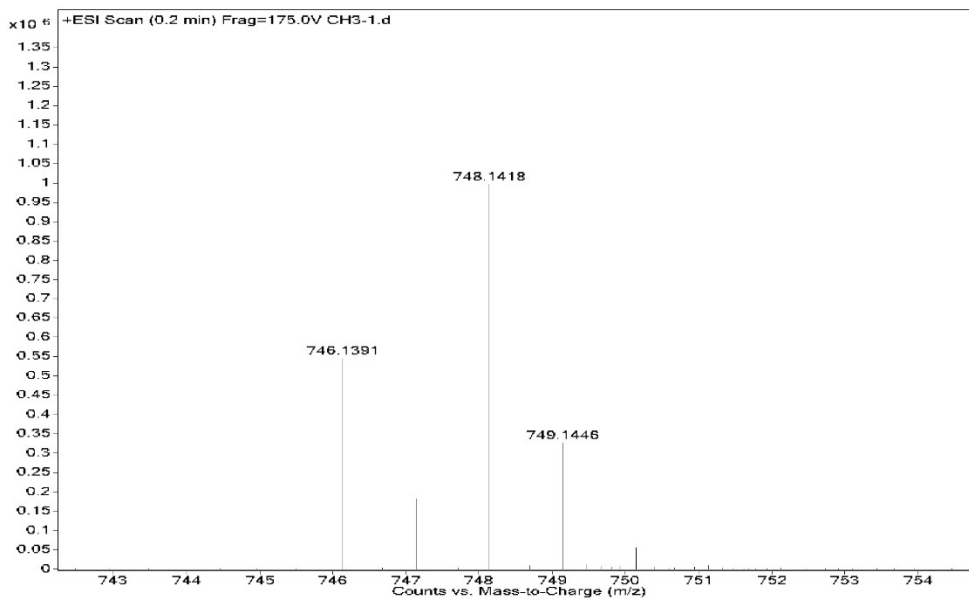

Fig. S3. Mass spectra of Ir-CH3TAZ.

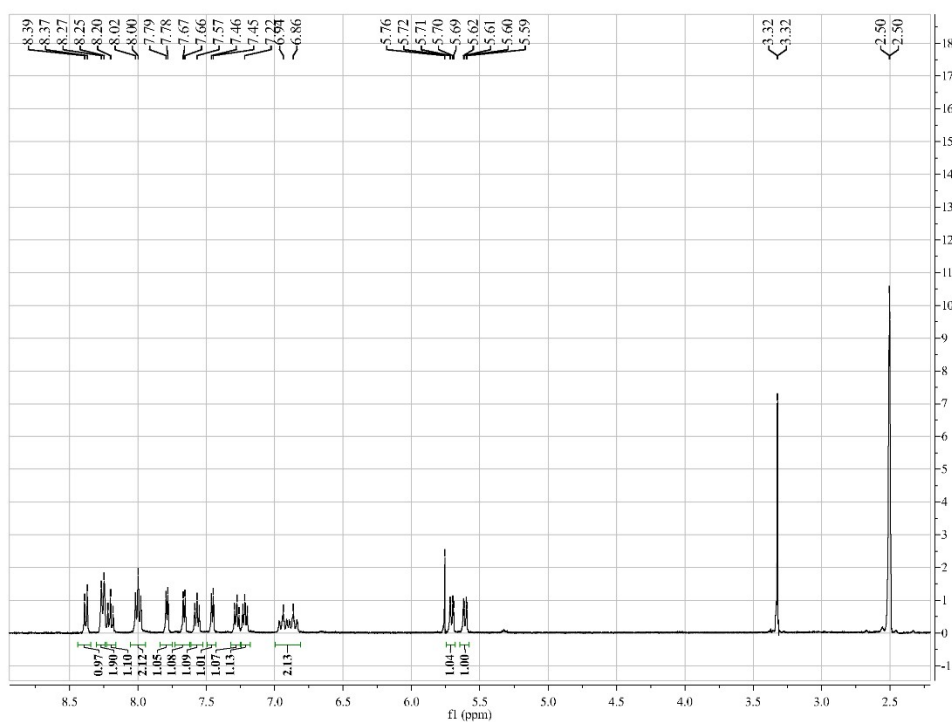

Fig. S4.  $^1\text{H}$  NMR spectra of IrTAZ in DMSO- $d_6$ .

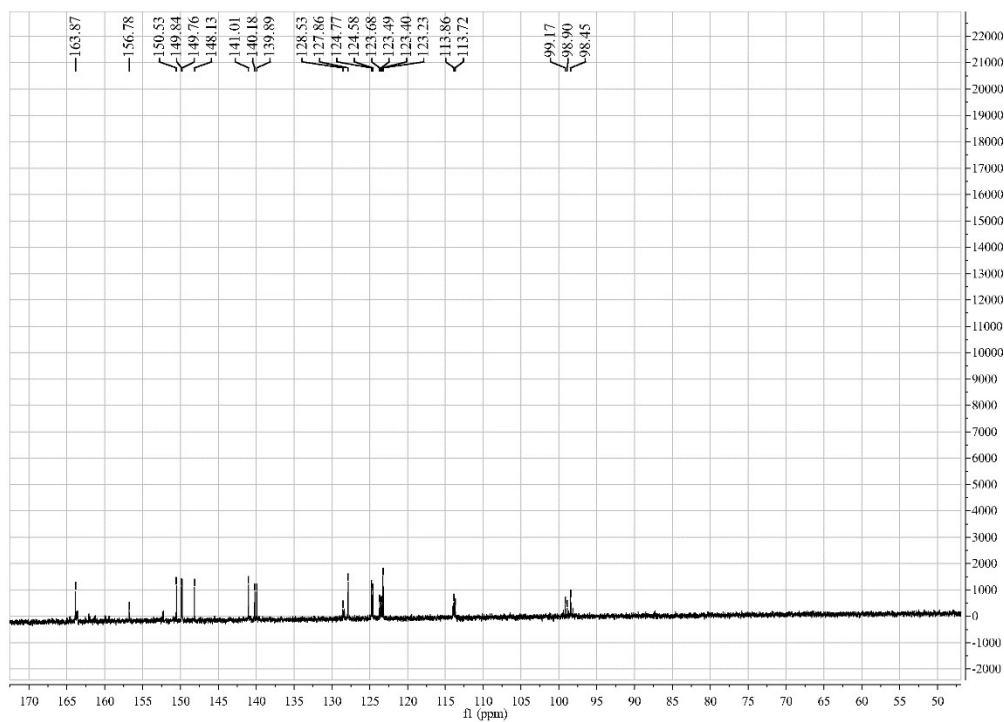

Fig. S5.  $^{13}\text{C}$  NMR spectra of IrTAZ in  $\text{DMSO-d}_6$ .

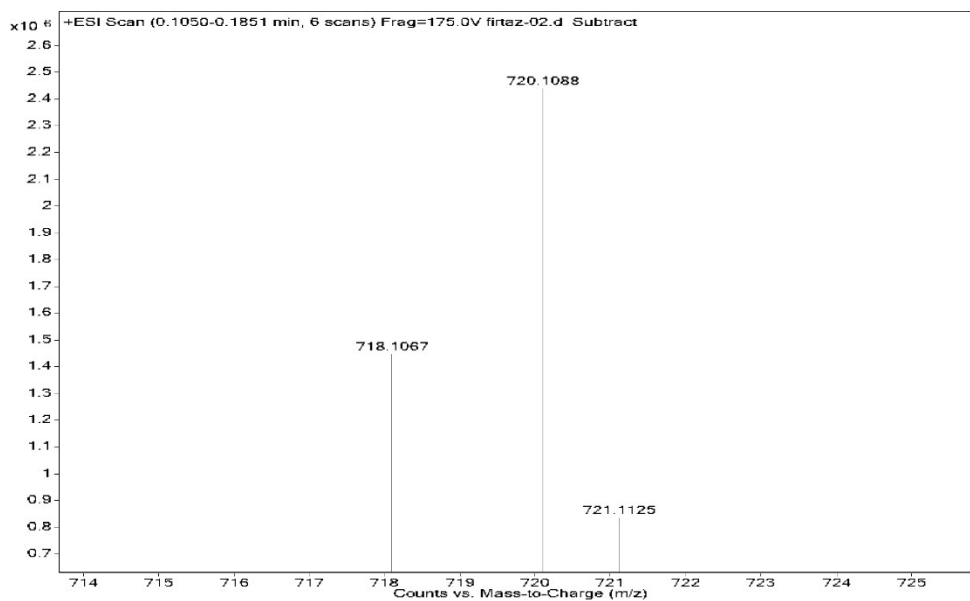

Fig. S6. Mass spectra of IrTAZ.

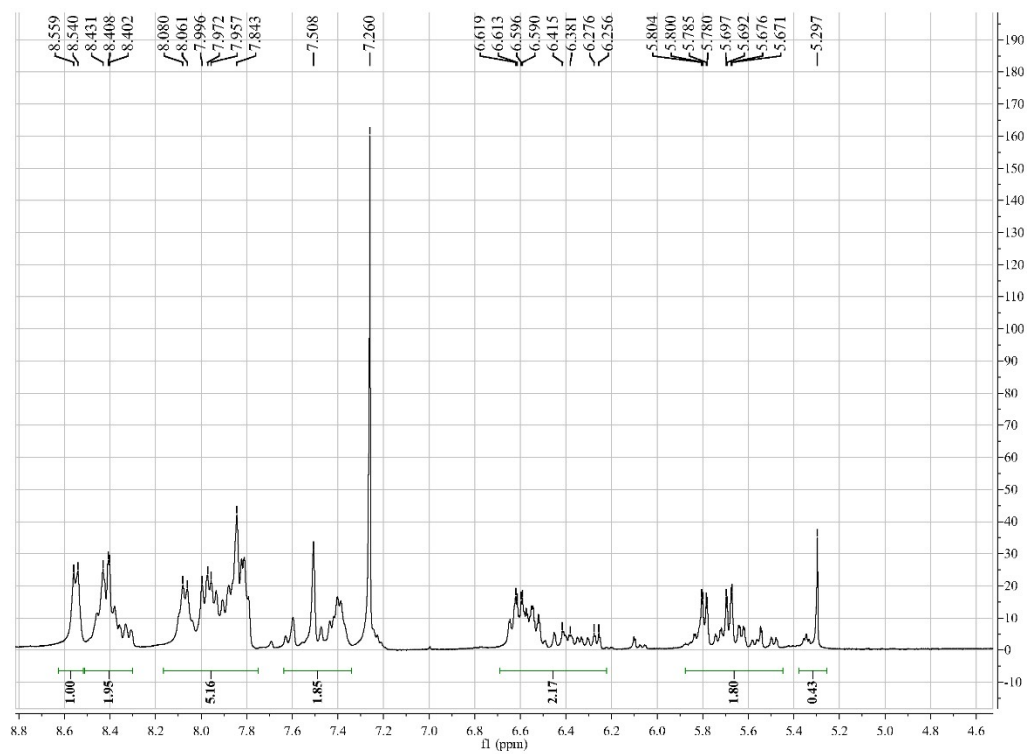

Fig. S7.  $^1\text{H}$  NMR spectra of Ir-CF<sub>3</sub>TAZ in  $\text{CDCl}_3$ .

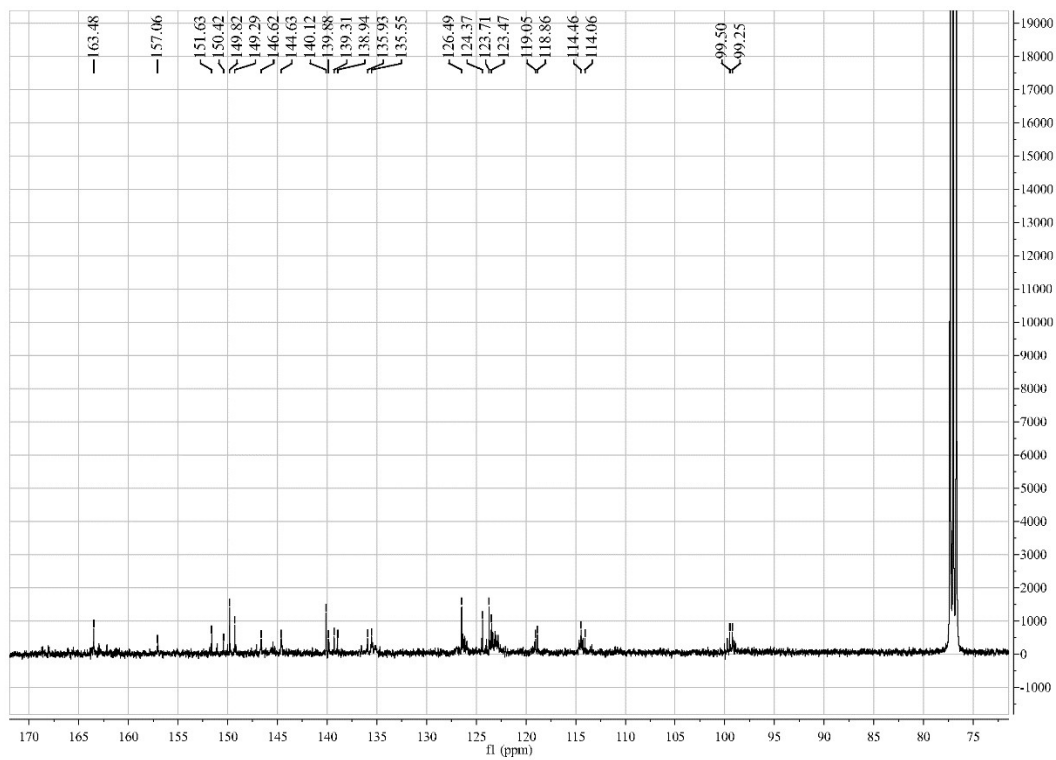

Fig. S8.  $^{13}\text{C}$  NMR spectra of Ir-CF<sub>3</sub>TAZ in  $\text{CDCl}_3$ .

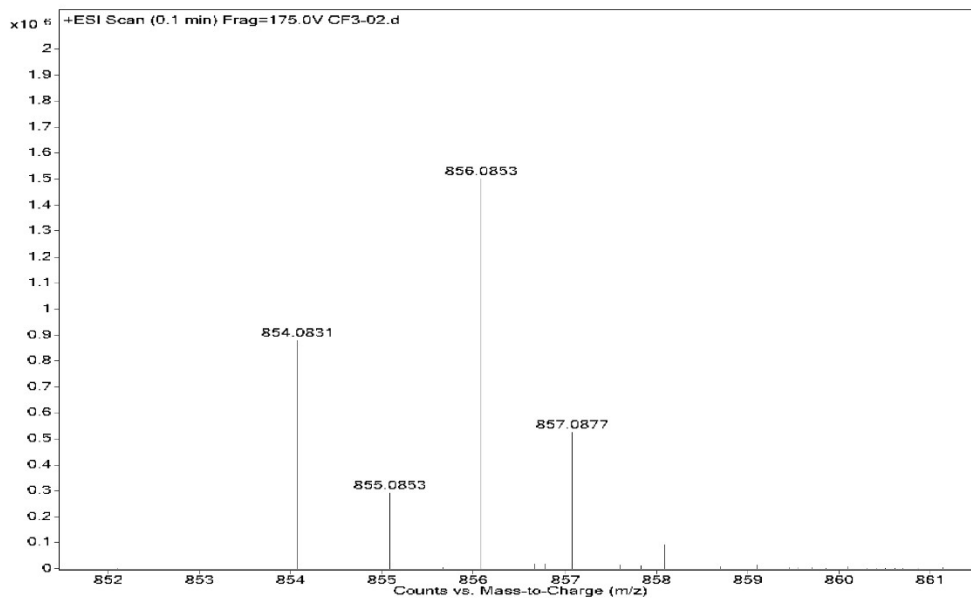

Fig. S9. Mass spectra of Ir-CF<sub>3</sub>TAZ.
